# Supplementary material for: Proton Beam Therapy for Treatment-Naïve Hepatocellular Carcinoma and Prognostic Significance of Albumin-Bilirubin (ALBI) Grade
Source: MDPI journal article supplement (doi:10.3390/cancers14184445), 2022-09-13
Supplement: s1 [file s1]

## Supplementary Materials

### Supplementary Figures

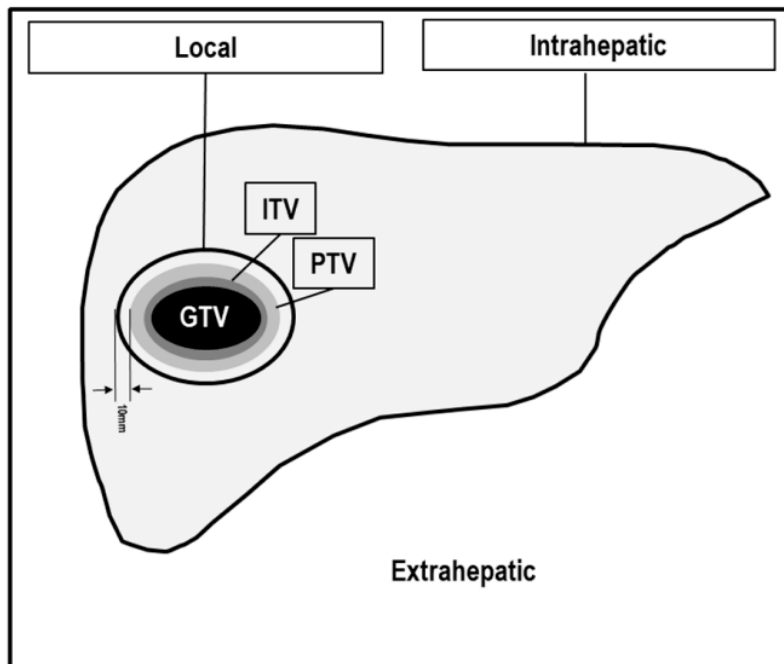

**Supplementary Figure S1.** Definition of Target volumes and disease progressions.

Abbreviations: GTV, gross tumor volume; ITV, internal target volume (internal target volume); and planning target volume; Local, local progression; Intrahepatic, intrahepatic progression; and Extrahepatic, Extrahepatic progression.

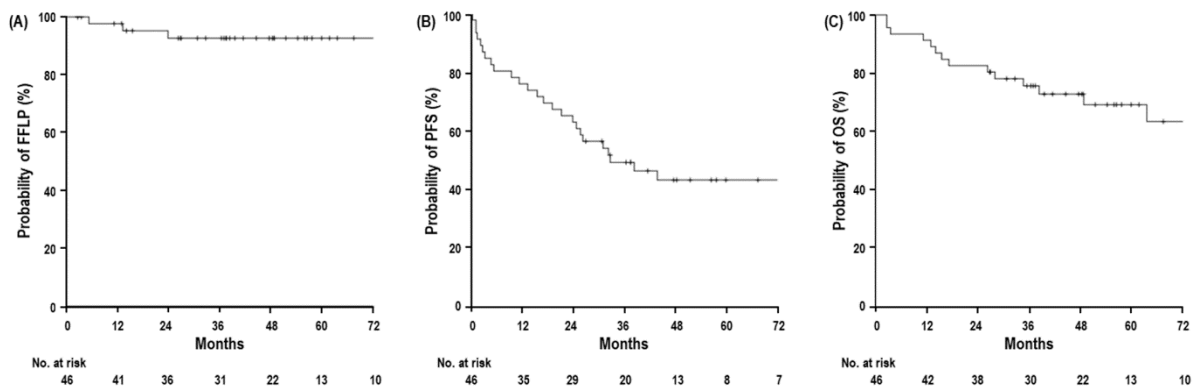

**Supplementary Figure S2.** Freedom from Local progression (FFLP) (A), progression-free survival (PFS) (B), and overall survival (OS) (C) curves in patients with treatment-naïve hepatocellular carcinoma treated with proton beam therapy.

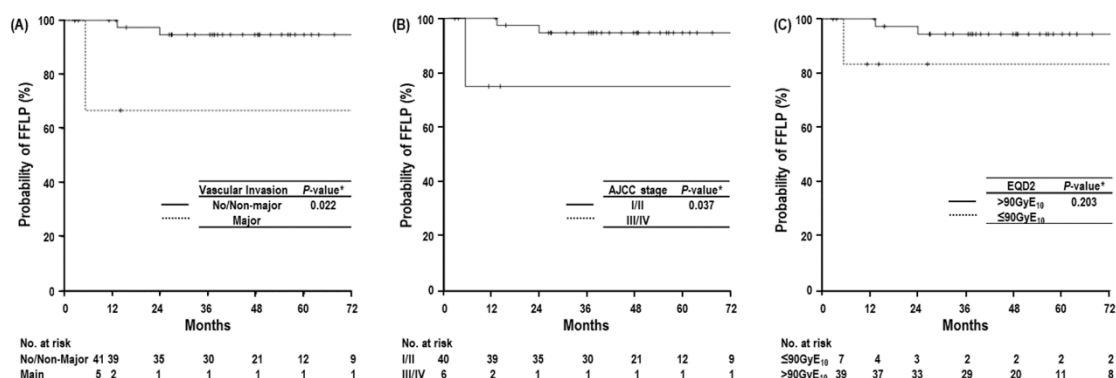

**Supplementary Figure S3.** Freedom from Local progression (FFLP) curves according to vascular invasion, AJCC stage, and EQD2 in all patients.

Abbreviations: Non-major, sectional and segmental branch; Major, main or first branch; AJCC stage, American Joint Committee on Cancer stage; EQD2, equivalent dose in 2 Gy fractions; and GyE, gray equivalent. \* log-rank test.

### Supplementary Table

**Supplementary Table S1.** Subsequent treatment modalities for disease progression

| Details of subsequent Tx     |                  | Distribution, n (%) |
|------------------------------|------------------|---------------------|
| Post-Tx to PBT lesion(s)     | No               | 43 (83.5)           |
|                              | Yes              | 3 (6.5)             |
|                              | TACE             | 2 (4.3)             |
|                              | SAT*             | 1 (2.2)             |
| Post-Tx to non-PBT lesion(s) | No               | 23 (50.0)           |
|                              | Yes              | 23 (50.0)           |
|                              | TACE             | 8 (17.4)            |
|                              | TACE ±RFA/PBT    | 2 (4.3)             |
|                              | TACE ± RT + SAT* | 2 (4.3)             |
|                              | PBT              | 2 (4.3)             |
|                              | RFA              | 1 (2.2)             |
|                              | TARE + LT        | 1 (2.2)             |
|                              | RFA+TACE+SAT*    | 1 (2.2)             |
|                              | SAT*± RT         | 6 (2.2)             |

Abbreviations: n, number of patients; Tx, treatment; TACE, transarterial chemoembolization; RFA, radiofrequency ablation; PBT, proton beam therapy; TARE, transarterial radioembolization; LT, liver transplantation; SAT, systemic anticancer therapy; and RT, radiotherapy.

\*Sorafenib (n=7), lenvatinib (n=1), and doxorubicin plus cisplatin (n=1)

**Supplementary Table S2.** Change of Child-Pugh score and albumin-bilirubin (ALBI) grade after proton beam therapy

| Change of Child-Pugh score | -1, n (%) | 0, n (%)  | +1, n (%) | +2, n (5) | <i>p value</i> * |
|----------------------------|-----------|-----------|-----------|-----------|------------------|
| All patients               | 3 (6.5)   | 42 (91.3) | 1 (2.2)   | 0 (0.0)   |                  |
| ALBI grade                 |           |           |           |           |                  |
| 1                          | 0 (0.0)   | 11 (100)  | 0 (0.0)   | 0 (0.0)   | 0.669            |
| 2/3                        | 3 (6.5)   | 31 (88.6) | 1 (2.9)   | 0 (0.0)   |                  |
| Tumor location             |           |           |           |           |                  |
| Hilar                      | 1 (5.3)   | 18 (94.7) | 0 (0.0)   | 0 (0.0)   | 1.000            |
| Non-hilar                  | 2 (7.4)   | 24 (88.9) | 1 (3.7)   | 0 (0.0)   |                  |
| Change of ALBI grade       | -1, n (%) | 0, n (%)  | +1, n (%) | +2, n (5) | <i>p value</i> * |
| All patients               | 0 (0.0)   | 42 (91.3) | 4 (8.7)   | 0 (0.0)   |                  |
| Tumor location             |           |           |           |           |                  |
| Hilar                      | 0 (0.0)   | 17 (89.5) | 2 (10.5)  | 0 (0.0)   | 1.000            |
| Non-hilar                  | 0 (0.0)   | 25 (92.6) | 2 (7.4)   | 0 (0.0)   |                  |

\*Fisher's exact test, two-tail.
